# Supplementary material for: Global relationships between crop diversity and nutritional stability
Source: PubMed Central journal article supplement (PMC8423801; doi:10.1038/s41467-021-25615-2), 2021-09-07
Supplement: 41467_2021_25615_MOESM1_ESM.pdf [file 41467_2021_25615_MOESM1_ESM.pdf]

1 **Title**

2 Global relationships between crop diversity and nutritional stability

3  
4 **Authors**

5 Charlie C. Nicholson<sup>1\*</sup>, Benjamin F. Emery<sup>2,3</sup>, Meredith T. Niles<sup>4,5,6</sup>

6  
7 **Affiliations**

8 <sup>1</sup> Department of Entomology and Nematology, University of California, Davis, 95616, CA, USA

9 <sup>2</sup> Vermont Complex Systems Center, University of Vermont, Burlington, 05405, VT, USA

0 <sup>3</sup> Sandia National Laboratories, Albuquerque, NM, 87185, USA

1 <sup>4</sup> Gund Institute for Environment, University of Vermont, Burlington, 05405, VT, USA

2 <sup>5</sup> Food Systems Program, University of Vermont, Burlington, 05405, VT, USA

3 <sup>6</sup> Department of Nutrition and Food Science, University of Vermont, Burlington, 05405, VT,  
4 USA

5  
6  
7 **Supplementary Materials**

8  
9 This file includes:

0  
1 **Supplementary Table 1.** Parameter estimates for the non-linear relationship between crop  
2 diversity and nutritional stability.

3 **Supplementary Table 2.** Crop diversity trends over time.

4 **Supplementary Table 3.** Macroeconomic factors drive nutritional stability differences.

5 **Supplementary Table 4.** Crop degree trends over time.

6 **Supplementary Table 5.** Comparing the relationship between nutritional stability and  
7 crop diversity using three saturating model forms.

8 **Supplementary Table 6.** Comparing differences in parameter estimates.

9 **Supplementary Table 7.** Change in crop diversity, degree and nutritional stability

0 **Supplementary Figure 1.** Parameter estimates from non-linear mixed effects models  
1 relating crop diversity and nutritional stability.

2 **Supplementary Figure 2.** Distributions of crop and nutrient diversity for regions and  
3 supply sources.

4 **Supplementary Figure 3.** Nutrient diversity increases with crop diversity and is  
5 associated with greater nutritional stability.

6 **Supplementary Figure 4.** Trends of nutritional stability considering different crop  
7 removal procedures.

8 **Supplementary Figure 5.** Nutritional stability depends on removal order of crops.

9 **Supplementary Figure 6.** Average degree of crops in crop-nutrient networks decreased  
0 over time.

1  
2  
3  
4

5 **SUPPLEMENTARY TABLES**

6

7 **Supplementary Table 1. Parameter estimates for the non-linear relationship between crop**  
 8 **diversity and nutritional stability.** Curves fit with a saturating function ( $\alpha *x/(\beta + x)$ ). This  
 9 functional form was selected after multiple model comparison (Supplementary Table 5).  
 0 Individual models were fit for each region. For details on regional differences see Figure S1 and  
 1 Supplementary Table 6. Values are model coefficients with standard error in parentheses.  
 2

|                | Nutritional stability $\sim \alpha *x/(\beta + x)$ |                      |                     |                     |                     |
|----------------|----------------------------------------------------|----------------------|---------------------|---------------------|---------------------|
|                | Africa                                             | Americas             | Asia                | Europe              | Oceania             |
| $\alpha$       | 1.097***<br>(0.042)                                | 1.335***<br>(0.099)  | 1.131***<br>(0.052) | 0.995***<br>(0.015) | 0.979***<br>(0.027) |
| $\beta$        | 4.965***<br>(0.814)                                | 12.574***<br>(2.486) | 6.738***<br>(1.085) | 2.353***<br>(0.366) | 2.263***<br>(0.299) |
| Observations   | 50                                                 | 39                   | 46                  | 33                  | 15                  |
| Log Likelihood | 67.642                                             | 39.932               | 56.713              | 71.664              | 26.597              |
| <i>Note:</i>   | . p<0.1; * p<0.05; ** p<0.01; *** p<0.001          |                      |                     |                     |                     |

3

4 **Supplementary Table 2. Crop diversity trends over time.** Results are from region-specific  
5 linear mixed effects model with an interaction between source and year as fixed-effects, country  
6 nested in source as random effects and an autoregressive correlation structure (i.e., time-lag  
7 correlation) to account for temporal autocorrelation. Values are model coefficients with standard  
8 error in parentheses.  
9  
0

|                | Crop diversity       |                      |                       |                         |                     |
|----------------|----------------------|----------------------|-----------------------|-------------------------|---------------------|
|                | Africa               | Americas             | Asia                  | Europe                  | Oceania             |
| Source         | -59.466*<br>(23.739) | -75.863*<br>(33.737) | -130.076*<br>(50.347) | -219.441***<br>(36.733) | -31.948<br>(35.314) |
| Year           | 0.047***<br>(0.008)  | 0.060***<br>(0.012)  | 0.071***<br>(0.018)   | 0.047***<br>(0.013)     | 0.018<br>(0.013)    |
| Source × Year  | 0.030*<br>(0.012)    | 0.039*<br>(0.017)    | 0.067**<br>(0.025)    | 0.113***<br>(0.018)     | 0.017<br>(0.018)    |
| Observations   | 5,546                | 4,217                | 4,577                 | 3,076                   | 1,628               |
| Log Likelihood | -8,590.126           | -7,130.420           | -8,581.432            | -5,601.669              | -2,366.630          |

*Note:* . p<0.1; \* p<0.05; \*\* p<0.01; \*\*\* p<0.001

1  
2

3 **Supplementary Table 3. Macroeconomic factors drive nutritional stability differences.**  
 4 Differences (estimate standard error in parentheses) in nutritional stability between (a) developing  
 5 and non-developing countries and (b) small island developing states (SIDS). Results are from  
 6 separate linear mixed effects models with an interaction between macroeconomic status and  
 7 supply source as fixed-effects and country as a random effect.  
 8

**(a)**

| source | contrast                    | estimate | SE     | df  | <i>t</i> ratio | <i>p</i> value |
|--------|-----------------------------|----------|--------|-----|----------------|----------------|
| P      | Developing - Non-developing | -0.0674  | 0.0265 | 363 | -2.541         | 0.0115         |
| PI     | Developing - Non-developing | -0.0693  | 0.0265 | 363 | -2.612         | 0.0094         |

**(b)**

| source | contrast        | estimate | SE     | df  | <i>t</i> ratio | <i>p</i> value |
|--------|-----------------|----------|--------|-----|----------------|----------------|
| P      | Non-SIDS - SIDS | 0.133    | 0.0257 | 363 | 5.172          | < 0.0001       |
| PI     | Non-SIDS - SIDS | 0.129    | 0.0255 | 363 | 5.083          | < 0.0001       |

0 **Supplementary Table 4. Crop degree trends over time.** Results are from region-specific linear  
 1 mixed effects model with an interaction between source and year as fixed-effects, country nested  
 2 in source as random effects and an autoregressive correlation structure (i.e., time-lag correlation)  
 3 to account for temporal autocorrelation. Values are model coefficients with standard error in  
 4 parentheses.  
 5

|                | Crop degree          |                      |                      |                      |                     |
|----------------|----------------------|----------------------|----------------------|----------------------|---------------------|
|                | Africa               | Americas             | Asia                 | Europe               | Oceania             |
| Source         | -4.168<br>(7.645)    | -8.645<br>(9.645)    | -0.841<br>(10.455)   | 35.491***<br>(5.733) | -9.692<br>(16.069)  |
| Year           | -0.022***<br>(0.003) | -0.024***<br>(0.003) | -0.020***<br>(0.004) | -0.011***<br>(0.002) | -0.015**<br>(0.006) |
| Source × Year  | 0.002<br>(0.004)     | 0.004<br>(0.005)     | 0.0005<br>(0.005)    | -0.018***<br>(0.003) | 0.005<br>(0.008)    |
| Observations   | 5,546                | 4,217                | 4,577                | 3,076                | 1,628               |
| Log Likelihood | -4,488.510           | -2,567.151           | -3,741.008           | -2,694.267           | -1,716.429          |

Note: . p<0.1; \* p<0.05; \*\* p<0.01; \*\*\* p<0.001

6  
7

8 **Supplementary Table 5. Comparing the relationship between nutritional stability and crop**  
 9 **diversity using three saturating model forms.** Based on AIC scores the saturating function  $\alpha$   
 0  $*x/(\beta + x)$  was used in subsequent analyses (Fig. 2; Supplementary Table 1 & Supplementary  
 1 Table 6). Values are model coefficients with standard error in parentheses.  
 2  
 3

|                | Nutritional stability      |                            |                            |
|----------------|----------------------------|----------------------------|----------------------------|
|                | $\alpha + \beta * \log(x)$ | $\alpha * x / (\beta + x)$ | $\alpha * \exp(\beta * x)$ |
| $\beta$        | 0.161***<br>(0.004)        | 5.126***<br>(0.462)        | 0.017***<br>(0.001)        |
| $\alpha$       | 0.234***<br>(0.002)        | 1.085***<br>(0.023)        | 0.592***<br>(0.017)        |
| Observations   | 183                        | 183                        | 183                        |
| Log Likelihood | 184.529                    | 200.093                    | 125.840                    |
| AIC            | -359.059                   | -390.186                   | -241.679                   |

Note: . p<0.1; \* p<0.05; \*\* p<0.01; \*\*\* p<0.001

4  
5

6 **Supplementary Table 6. Comparing differences in parameter estimates.** Parameter values for  
 7 region-specific relationship between nutritional stability and crop diversity (Africa is reference  
 8 contrast). Curves fit with a saturating function ( $\alpha *x/(\beta + x)$ ) via non-linear mixed effects models  
 9 (see Methods) and coefficient values were extracted from random effects for each country. Values  
 0 are model coefficients with standard error in parentheses.

|              | Saturating function parameter |                      |
|--------------|-------------------------------|----------------------|
|              | $\alpha$                      | $\beta$              |
| Americas     | 0.238***<br>(0.00000)         | 7.619***<br>(0.100)  |
| Asia         | 0.034***<br>(0.00000)         | 1.762***<br>(0.095)  |
| Europe       | -0.102***<br>(0.00000)        | -2.602***<br>(0.105) |
| Oceania      | -0.118***<br>(0.00000)        | -2.692***<br>(0.137) |
| Observations | 183                           | 183                  |

*Note:* . p<0.1; \* p<0.05; \*\* p<0.01; \*\*\* p<0.001

2  
3

4 **Supplementary Table 7. Change in crop diversity, degree and nutritional stability.** Results  
5 are from a linear model testing whether change in crop diversity and degree explain variation in  
6 nutritional stability change ( $R_N \sim \text{diversity change} + \text{degree change}$ ).  
7

|                       | Estimate | Std. Error | t value | P value |
|-----------------------|----------|------------|---------|---------|
| Intercept             | -0.016   | 0.005      | -3.290  | 0.001   |
| Crop degree change    | 0.031    | 0.002      | 15.280  | <0.001  |
| Crop diversity change | 0.010    | 0.001      | 16.740  | <0.001  |

8  
9



0 SUPPLEMENTARY FIGURES

1  
2

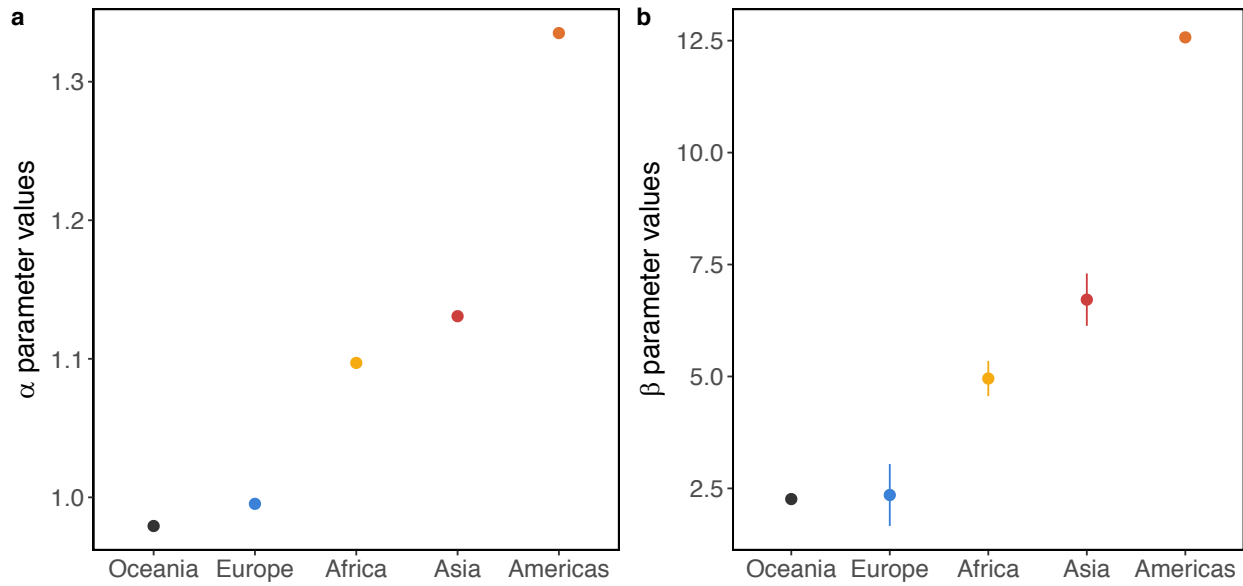

3  
4  
5  
6  
7  
8  
9  
0

**Supplementary Figure 1. Parameter estimates from non-linear mixed effects models relating crop diversity and nutritional stability.** Curves fit with a saturating function ( $\alpha * x / (\beta + x)$ ) via non-linear mixed effects models (Supplementary Table 6; see Methods) and coefficient values were extracted from random effects for each country. Points depict the average  $\pm$  sd across countries for the  $\alpha$  parameter (A) and  $\beta$  parameter (B).

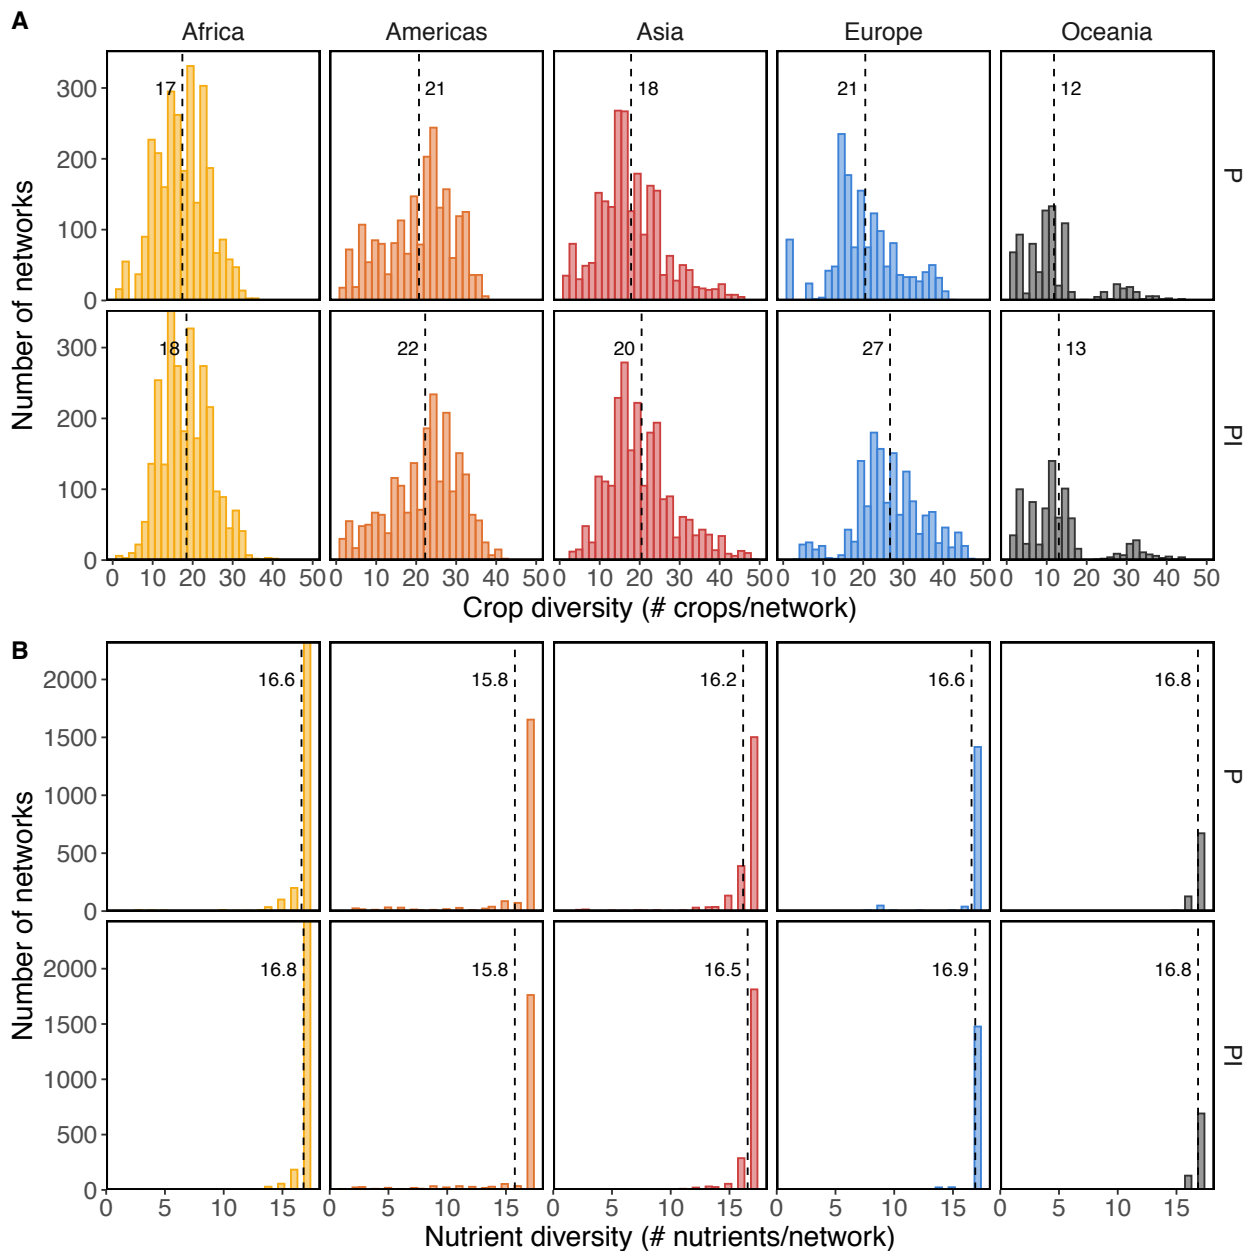

1  
2 **Supplementary Figure 2. Distributions of crop and nutrient diversity for regions and supply**  
3 **sources.** Each bar depicts a region's number of networks for separate country-year combinations  
4 belonging to a specific levels of crop diversity (A) or nutrient diversity (B) for both production  
5 (P; top rows) and production and imports (PI; bottom rows) sources. Average values across  
6 countries and years are provided and depicted by the dashed vertical line. Crop diversity could be  
7 comprised of 225 different FAO food balance crop commodities. There are 17 micro-nutrients  
8 available in the GeNUS dataset that we analyzed (calories, fats, water, ash and refuse were not  
9 included). Over 83% of all crop nutrient networks (N = 19044) possessed all 17 micro-nutrients  
0 that we analyzed here.

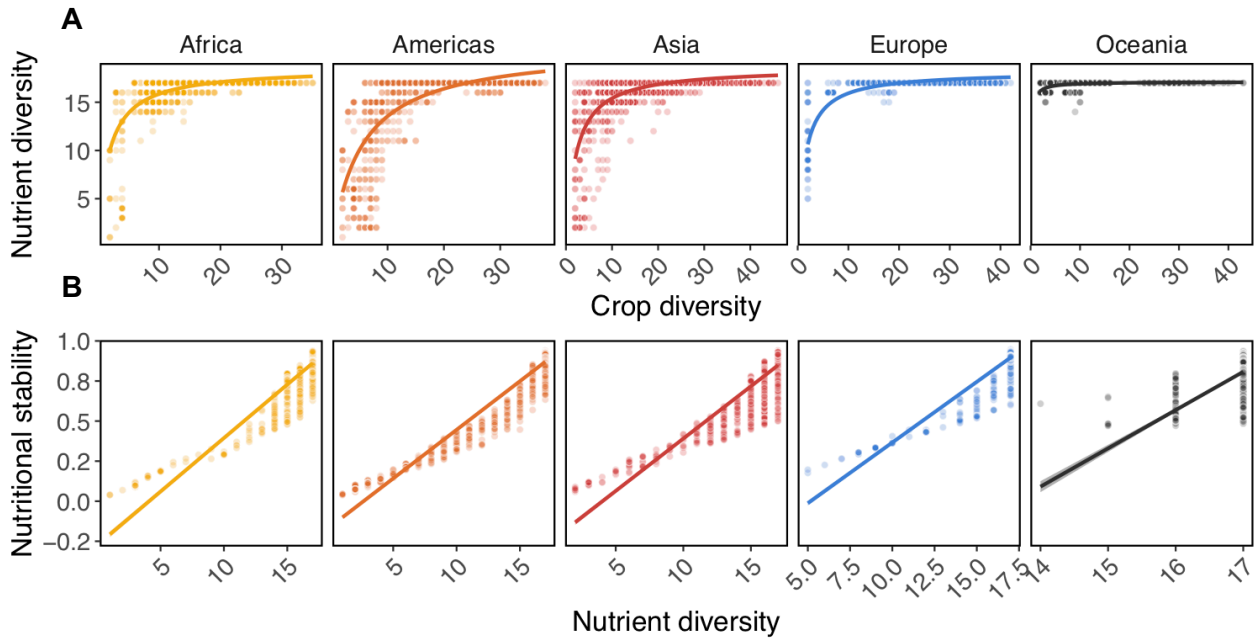

**Supplementary Figure 3. Nutrient diversity increases with crop diversity and is associated with greater nutritional stability.** Each point represents the crop diversity, nutrient diversity or nutritional stability from a country's crop-nutrient network in a given year. Non-linear relationships were fitted with same saturating function ( $\alpha * x / (\beta + x)$ ) as in the main text.

2  
3  
4  
5  
6  
7

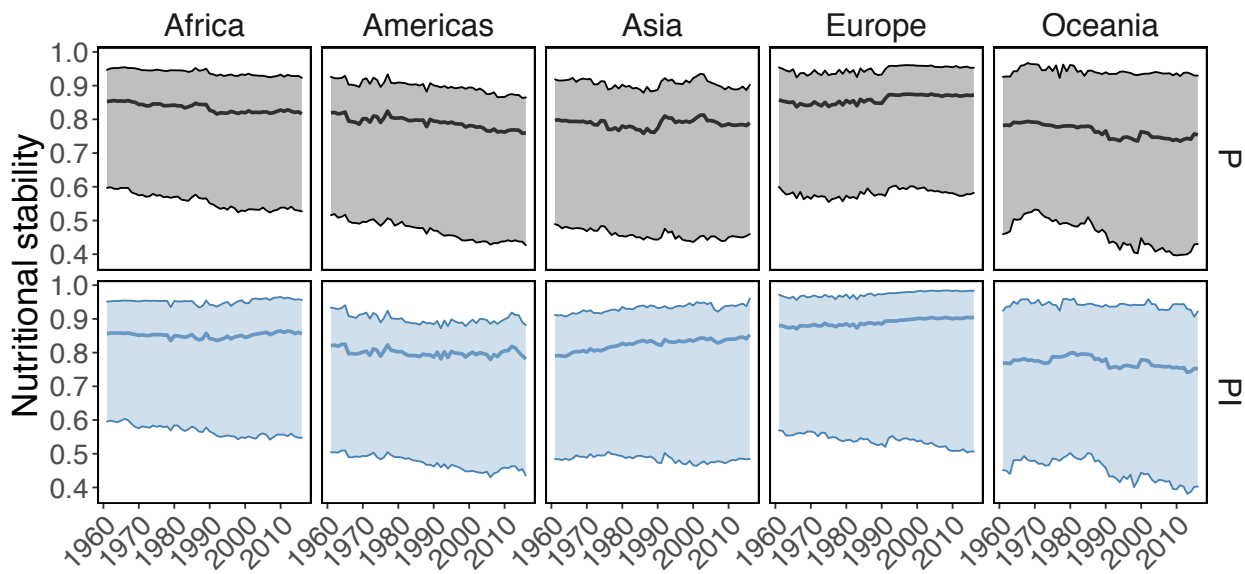

8  
 9 **Supplementary Figure 4. Trends of nutritional stability considering different crop removal**  
 0 **procedures.** Nutritional stability ( $R_N$ ) can be calculated different ways by changing the removal  
 1 sequence of crops. In the main manuscript we report  $R_N$  values based on randomized crops loss.  
 2 We also ordered crop loss from most to least connected crops (i.e. from those containing the most  
 3 nutrients to those containing the fewest), and vice versa. Here we show trends in randomized  $R_N$   
 4 (solid middle line) with an upper bound derived from least-to-most removal and a lower bound  
 5 derived from most-to-least removal for both production (P; top row) and production + imports  
 6 (PI; bottom row) sources.

7

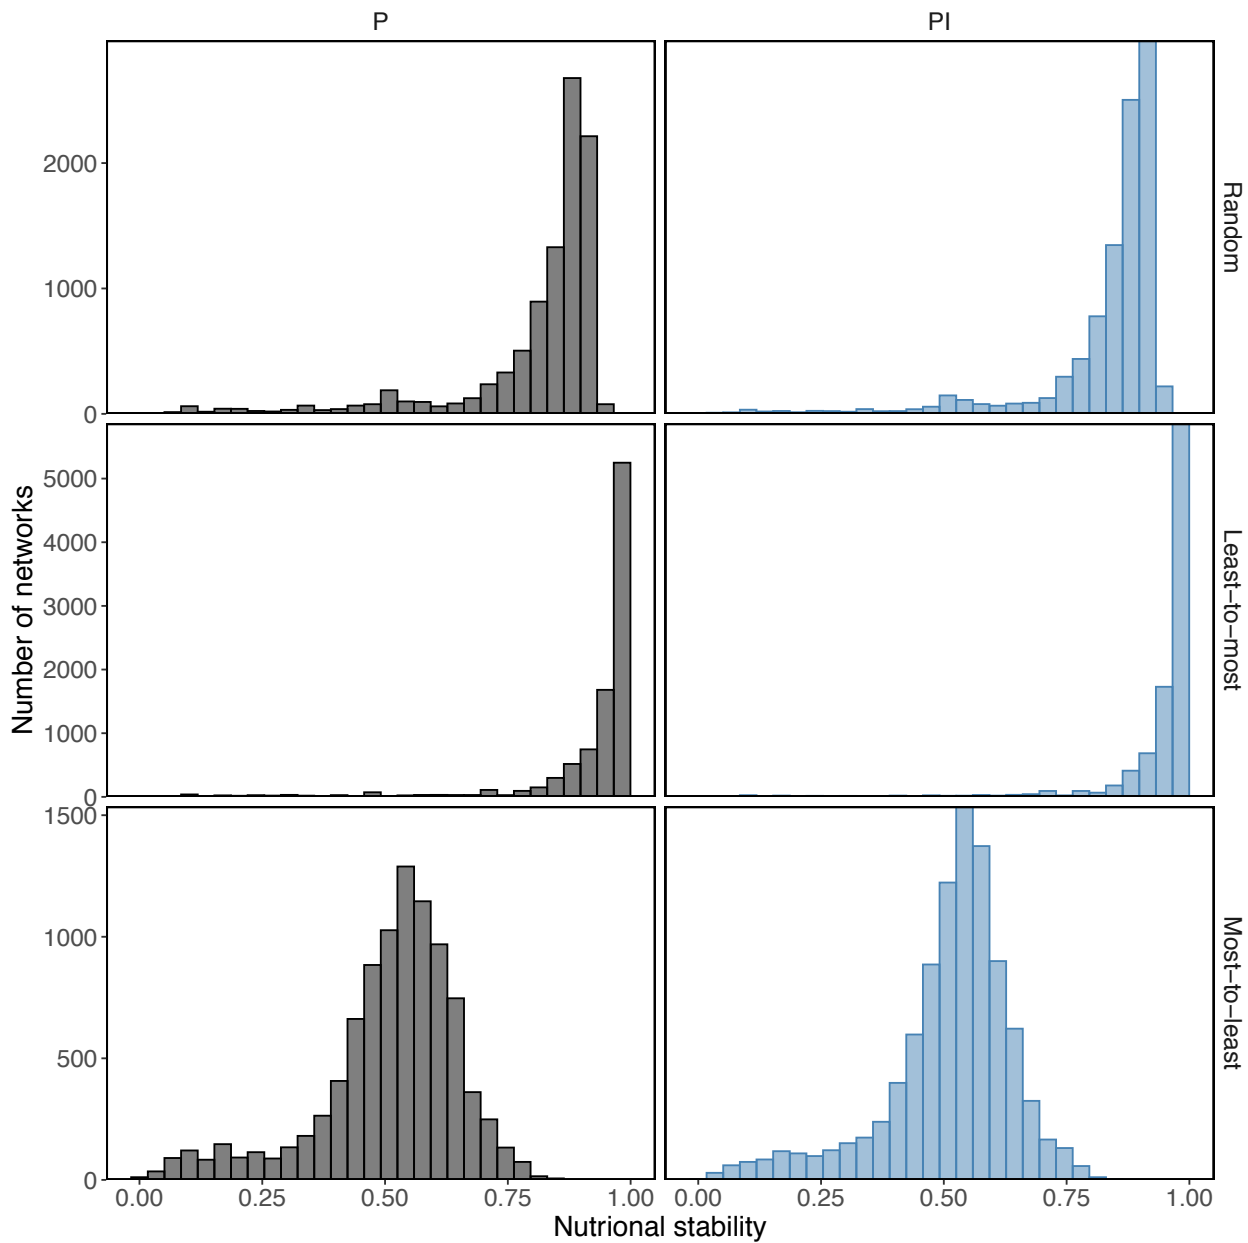

8  
9  
0  
1  
2  
3  
4  
5

**Supplementary Figure 5. Nutritional stability values of networks based on different crop removal order.** Throughout the main manuscript we present nutritional stability ( $R_N$ ) of networks derived from permutation of randomized crop removal order (1st row). However, removal order can also be directed. Removing crops in order of least-to-most connected (i.e. from those containing the fewest nutrients to those containing the most) generated larger  $R_N$  values (2<sup>nd</sup> row), whereas removing crops from most-to-least connected reduced  $R_N$  values (3<sup>rd</sup> row).

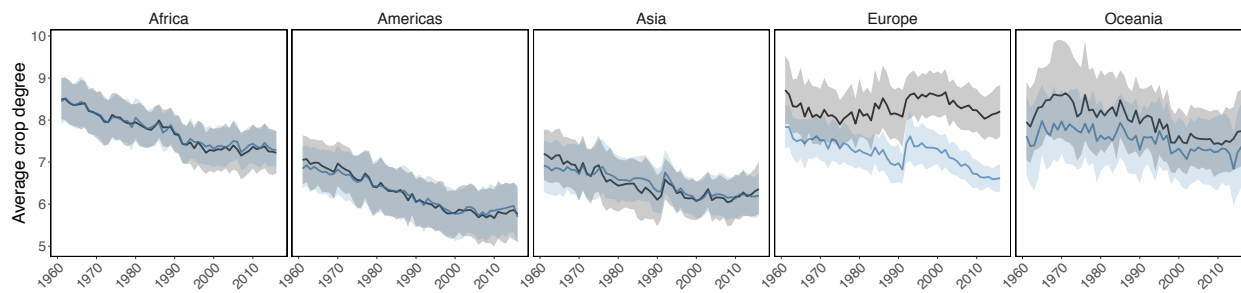

6  
7  
8  
9  
0  
1  
2  
3

**Supplementary Figure 6. Average degree of crops in crop-nutrient networks decreased over time.** Only Europe exhibited source-dependent differences, with production plus imports (blue) decreasing more than production alone (black), see Supplementary Table 4 for statistics. Trend lines depict means  $\pm$  95% confidence intervals.
